# Supplementary material for: Mucosal tumor vaccination delivering endogenous tumor antigens protects against pulmonary breast cancer metastases
Source: PubMed Central journal article supplement — J Immunother Cancer. 2024 Mar 7;12(3):e008652. doi: 10.1136/jitc-2023-008652 (PMC10921546; doi:10.1136/jitc-2023-008652), 2024-03-07
Supplement: jitc-2023-008652supp001.pdf [file jitc-2023-008652supp001.pdf]

## SUPPLEMENTARY FIGURES

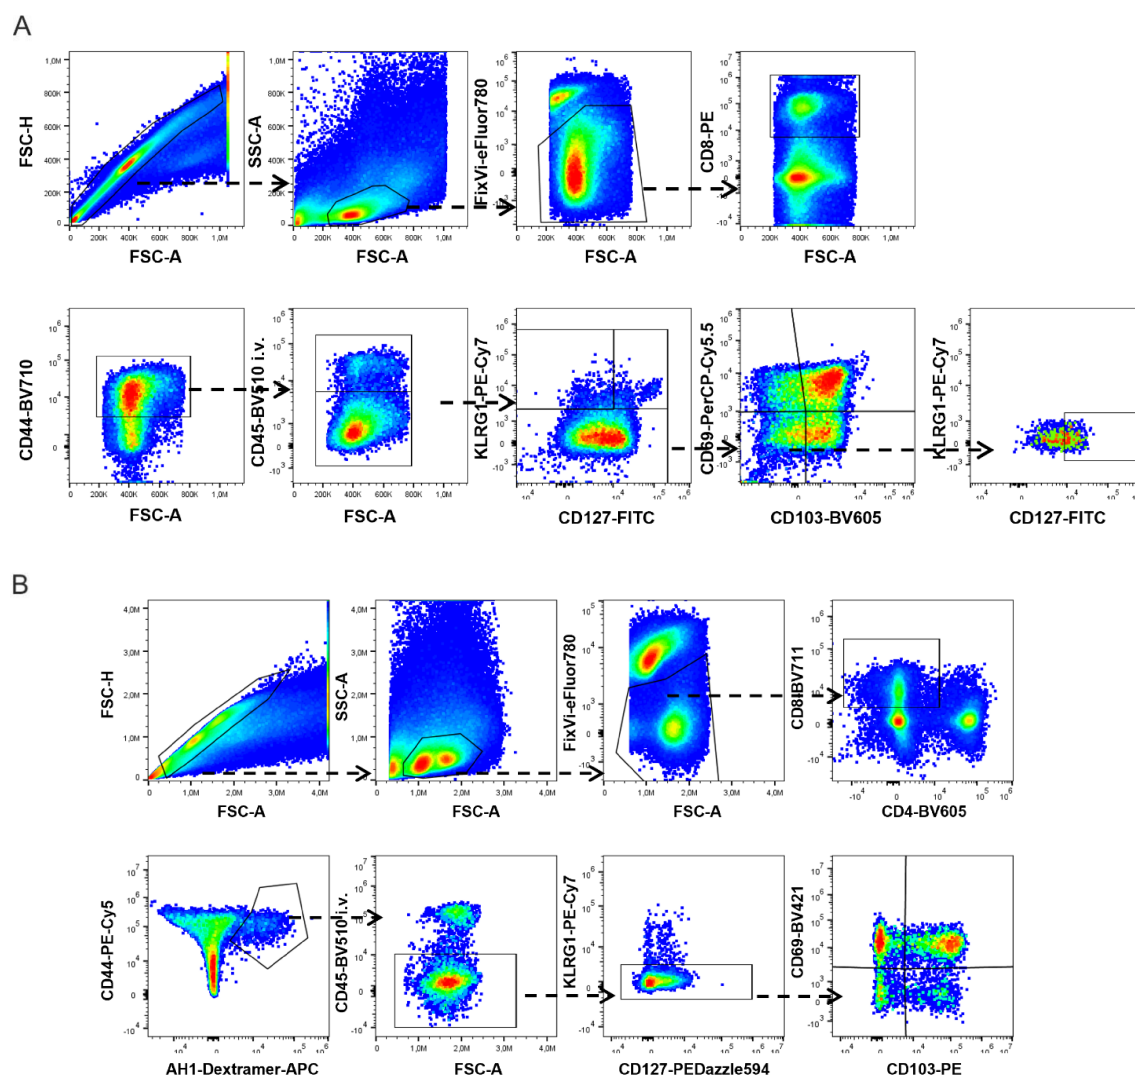

**Suppl. Fig. 1: Flow Cytometry gating of phenotype analysis.** The gating path for the phenotype staining of a lung sample of an Ad-4T1 immunized mouse is illustrated. In brief, vital lymphocytes were selected in the single cells. CD8<sup>+</sup> T cells were analyzed for antigen-experienced CD44<sup>+</sup> T cells and *iv*<sup>-/-</sup> T cell populations. Populations were further characterized by effector marker KLRG1 and memory marker CD127 expression and the expression of the residency markers CD69 and CD103 (A). The gating path for the Dextramer staining a lung sample of an Ad-4T1 immunized mouse is illustrated. In brief, vital lymphocytes were selected in the single cells. CD8<sup>+</sup> T cells were analyzed for antigen-experienced CD44<sup>+</sup> AH1-Dextramer<sup>+</sup> T cells and *iv*<sup>-/-</sup> T cell populations. Populations were further characterized by effector marker KLRG1 and memory marker CD127 expression and the expression of the residency markers CD69 and CD103 (B).

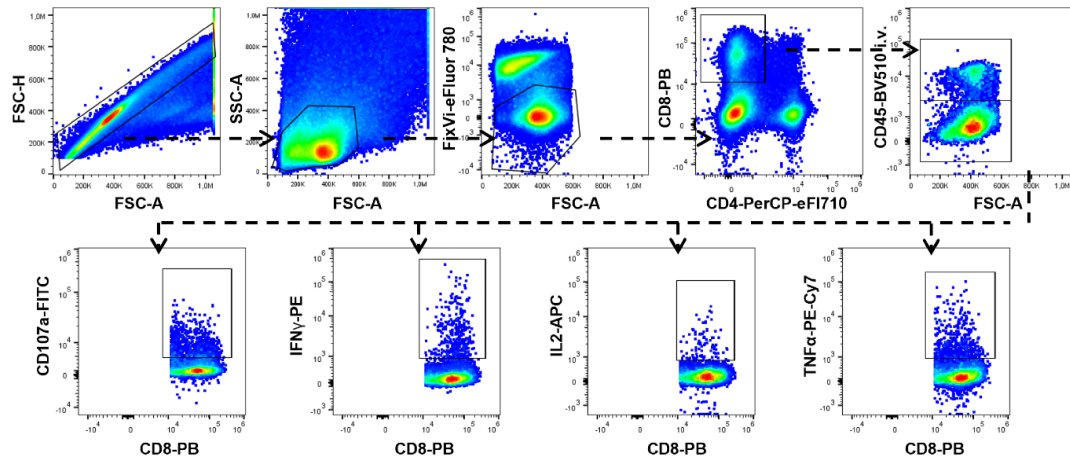

**Suppl. Fig. 2: Flow Cytometry gating of intracellular cytokine staining.** Depicted is the gating path of a lung sample of an Ad-4T1 immunized mouse. In brief, vital lymphocytes were selected in the single cells. Cytokine expression of IL2, IFN $\gamma$  and TNF $\alpha$  or degranulation by CD107a was assessed within the CD8<sup>+</sup> T cells, depending on the respective experiment, in CD45<sup>iv+</sup> or *iv* populations.
